# Supplementary material
Source: HighWire-hosted journal article supplement (https://bjsm.bmj.com/content/57/4/230)
Supplement: inline-supplementary-material-2 [file inline-supplementary-material-2.pdf]

Supplementary Table 1 Description of included trials

| Author name (year)<br>Country, World Bank classification          | PEDro score<br>Randomised/analysed | Participants<br>(Setting, health status; n, age mean (SD), % female by group)                                                                                                                                                                                                                                                                                         | Intervention                                                                                                                                                                                                                                                                                                                                                                                                                                                                                                                                                                                                                                                                                                                                                                                                                   | Control         | Outcomes                                                                                                                                                                                                                                                                                                                                                                                                                                                                                                                                                | Follow up                                        |
|-------------------------------------------------------------------|------------------------------------|-----------------------------------------------------------------------------------------------------------------------------------------------------------------------------------------------------------------------------------------------------------------------------------------------------------------------------------------------------------------------|--------------------------------------------------------------------------------------------------------------------------------------------------------------------------------------------------------------------------------------------------------------------------------------------------------------------------------------------------------------------------------------------------------------------------------------------------------------------------------------------------------------------------------------------------------------------------------------------------------------------------------------------------------------------------------------------------------------------------------------------------------------------------------------------------------------------------------|-----------------|---------------------------------------------------------------------------------------------------------------------------------------------------------------------------------------------------------------------------------------------------------------------------------------------------------------------------------------------------------------------------------------------------------------------------------------------------------------------------------------------------------------------------------------------------------|--------------------------------------------------|
| Andersen et al. (2016) <sup>a,b,c,d</sup><br>Denmark, High income | 7/10<br>27/26                      | <p><b>Recruitment setting:</b><br/>Community</p> <p><b>Health status:</b> Healthy old men</p> <p><b>Soccer training group:</b><br/>n=10 (randomised); 9 (analysed)<br/><b>Age:</b> 68 (4.0)<br/><b>% female:</b> 0% (100% male)</p> <p><b>B. Control group:</b><br/>n= 8 (randomised and analysed)<br/><b>Age:</b> 67.4 (2.7)<br/><b>% female:</b> 0% (100% male)</p> | <p>The training consisted of small-sided games (three, four or five-a-side). For the first 12 weeks, each training session was initiated with a 15-min low-intensity warm-up, including stretching, and the training was organised as 3x15-min exercise periods with 2-min rest periods. From 13–52 weeks, the players perform an individual 5-min warm-up prior to the football training followed by 4x15-min exercise periods with 2-min rest periods.</p> <p><b>Type of sport:</b> Soccer</p> <p><b>Duration of the intervention (weeks):</b> 16<sup>a</sup>, 52<sup>b,c,d</sup></p> <p><b>Frequency:</b> 2 sessions/week for 16 weeks<sup>a</sup>, and 3sessions/week for the following 36 weeks</p> <p><b>Session duration (min):</b> 60</p> <p><b>Delivered by:</b> Not specified</p> <p><b>Location:</b> University</p> | No intervention | <p><b>Fitness<sup>a</sup></b> measure by cycling test with breath-by-breath gas analysis (VO2 max)</p> <p><b>Body composition<sup>b</sup>:</b> whole body fat mass and lean mass were determined by whole body Dual energy X-ray absorptiometry (DXA) scanning.</p> <p><b>BMD<sup>c</sup>:</b> whole body measured by DXA.</p> <p><b>Strength<sup>d</sup></b> assessed by an isokinetic dynamometer.</p> <p><b>Balance<sup>d</sup></b> measured by a force platform.</p> <p><b>Functional function<sup>d</sup></b> measured by a sit-to-stand test.</p> | 16 weeks <sup>a</sup><br>52 weeks <sup>b,c</sup> |

| Author name (year)                              | PEDro score                                       | Participants                                                                                                                                                                                                                                                                                                                                                                       | Intervention                                                                                                                                                                                                                                                                                                                                                                                                                                                                                              | Control              | Outcomes                                                                                                                                                                                                                                                                                                                                                                                                                                                                                                                                                                                     | Follow up |
|-------------------------------------------------|---------------------------------------------------|------------------------------------------------------------------------------------------------------------------------------------------------------------------------------------------------------------------------------------------------------------------------------------------------------------------------------------------------------------------------------------|-----------------------------------------------------------------------------------------------------------------------------------------------------------------------------------------------------------------------------------------------------------------------------------------------------------------------------------------------------------------------------------------------------------------------------------------------------------------------------------------------------------|----------------------|----------------------------------------------------------------------------------------------------------------------------------------------------------------------------------------------------------------------------------------------------------------------------------------------------------------------------------------------------------------------------------------------------------------------------------------------------------------------------------------------------------------------------------------------------------------------------------------------|-----------|
| Country, World Bank classification              | Randomised/analysed                               | (Setting, health status; n, age mean (SD), % female by group)                                                                                                                                                                                                                                                                                                                      |                                                                                                                                                                                                                                                                                                                                                                                                                                                                                                           |                      |                                                                                                                                                                                                                                                                                                                                                                                                                                                                                                                                                                                              |           |
| Bjerre et al (2019)<br><br>Denmark, High income | 8/10<br><br>214/214 (Intention to treat analysis) | <p><b>Recruitment setting:</b><br/>Danish urological departments.</p> <p><b>Health status:</b> Men diagnosed with prostate cancer</p> <p><b>Recreational soccer:</b><br/>n= 109 (randomised and analysed)<br/>Age: 67.8 (6.2)<br/>% female: 0% (100% male)</p> <p><b>Usual care group:</b><br/>n= 105 (randomised and analysed)<br/>Age: 69 (6.2)<br/>% female: 0% (100% male)</p> | <p><b>A.</b> The training consisted of a 20-minute warm-up based on the FIFA 11+ program, with modified exercises for the upper body, followed by a 20-minute period with drills and lastly a 20-minute period of match play.</p> <p><b>Type of sport:</b> Soccer</p> <p><b>Duration of the intervention (weeks):</b> 26</p> <p><b>Frequency:</b> 2 sessions/week</p> <p><b>Session duration (min):</b> 60</p> <p><b>Delivered by:</b> Local soccer coaches</p> <p><b>Location:</b> Local soccer club</p> | <b>B.</b> Usual care | <p><b>Self-reported physical activity</b> assessed by International Physical Activity Questionnaire (IPAQ).</p> <p><b>Physical function</b> assessed by the physical domain of the 12-Item Short Form Health Survey (SF-12).</p> <p><b>Body composition:</b> Whole-body fat mass and lean body mass assessed by DXA.</p> <p><b>Bone mineral density (BMD):</b> whole body BMD assessed by DXA.</p> <p><b>Mental health</b> assessed by mental health domain of SF-12.</p> <p><b>Quality of life</b> assessed by Functional Assessment of Cancer Therapy–Prostate (FACT-P) questionnaire.</p> | 26 weeks  |

| Author name (year)<br>Country, World Bank classification             | PEDro score<br>Randomised/analysed | Participants<br>(Setting, health status; n, age mean (SD), % female by group)                                                                                                                                                                                                                                               | Intervention                                                                                                                                                                                                                                                                                                                                                                                                                                                                           | Control                                                             | Outcomes                                                                                                                                                                                                                                                                                                                                                                         | Follow up |
|----------------------------------------------------------------------|------------------------------------|-----------------------------------------------------------------------------------------------------------------------------------------------------------------------------------------------------------------------------------------------------------------------------------------------------------------------------|----------------------------------------------------------------------------------------------------------------------------------------------------------------------------------------------------------------------------------------------------------------------------------------------------------------------------------------------------------------------------------------------------------------------------------------------------------------------------------------|---------------------------------------------------------------------|----------------------------------------------------------------------------------------------------------------------------------------------------------------------------------------------------------------------------------------------------------------------------------------------------------------------------------------------------------------------------------|-----------|
| De Sousa et al. (2019) <sup>e,f</sup><br>Brazil, Upper-Middle income | 4/10<br>51/41                      | <b>Recruitment setting:</b><br>Community<br><br><b>Health status:</b> Type-2 diabetes<br><br><b>Age (total sample):</b> 61 (6)<br><br><b>Soccer + nutrition group:</b><br>n= 19 (analysed)<br>Age: not specified<br>% female: 47%<br><br><b>Nutrition group:</b><br>n= 22 (analysed)<br>Age: not specified<br>% female: 55% | Supervised recreational soccer training consisted of ordinary small-sided (3v3 to 7v7) plus nutritional intervention.<br><br><b>Type of sport:</b> Soccer<br><br><b>Duration of the intervention (weeks):</b> 12<br><br><b>Frequency:</b> 3 sessions/week<br><br><b>Session duration (min):</b> 40<br><br><b>Delivered by:</b> not specified<br><br><b>Location:</b> not specified                                                                                                     | Nutritional intervention: nutritional counselling plus dietary plan | <b>Body composition<sup>c</sup>:</b> body fat mass measured by DXA.<br><br><b>Body composition<sup>f</sup>:</b> Whole-body fat mass assessed using total-body DXA scanning.<br><br><b>Fitness<sup>f</sup></b> measured by cycling test with breath-by-breath gas analysis (VO <sub>2</sub> max).                                                                                 | 12 weeks  |
| Pedersen et al. (2016)<br>Denmark, High income                       | 4/10<br>72/44                      | <b>Recruitment setting:</b><br>Seniors centres<br><br><b>Health status:</b> healthy untrained participants<br><br><b>Team sport training group:</b><br>n= 25 (randomised); 13 (analysed)<br>Age: 79 (7)<br>% female: 69%<br><br><b>Control group:</b><br>n= 21 (randomised); 12 (analysed)<br>Age: 81 (5)<br>% female: 50%  | The team training group consisted of small-sided floorball, “cone ball,” “hula goal”. All team sport games were played 3 vs 3 or 4 vs 4 inside on a plastic floor sized ≈10 × 10 m, and no physical contact was allowed.<br><br><b>Type of sport:</b> floorball<br><br><b>Duration of the intervention (weeks):</b> 12<br><br><b>Frequency:</b> 2 sessions/week<br><br><b>Session duration (min):</b> 60<br><br><b>Delivered by:</b> not specified<br><b>Location:</b> Seniors centres | Control group not specified                                         | <b>Physical activity<sup>*</sup></b> measured by accelerometer.<br><br><b>Strength<sup>*</sup></b> assessed using maximal repetitions of bicep curls.<br><br><b>Physical function<sup>*</sup></b> measured by time up and go.<br><br><b>Quality of life<sup>*</sup></b> measured using SF-12 and the Danish version of the Older People’s Quality of Life questionnaire (OPQOL). | 12 weeks  |

| Author name (year)                                 | PEDro score         | Participants                                                                                                                                                                                                                                                                                                                                                                                        | Intervention                                                                                                                                                                                                                                                                                                                                                                                                                                                                                                                                                                                                                                                                             | Control                     | Outcomes                                                                                                                                            | Follow up |
|----------------------------------------------------|---------------------|-----------------------------------------------------------------------------------------------------------------------------------------------------------------------------------------------------------------------------------------------------------------------------------------------------------------------------------------------------------------------------------------------------|------------------------------------------------------------------------------------------------------------------------------------------------------------------------------------------------------------------------------------------------------------------------------------------------------------------------------------------------------------------------------------------------------------------------------------------------------------------------------------------------------------------------------------------------------------------------------------------------------------------------------------------------------------------------------------------|-----------------------------|-----------------------------------------------------------------------------------------------------------------------------------------------------|-----------|
| Country, World Bank classification                 | Randomised/analysed | (Setting, health status; n, age mean (SD), % female by group)                                                                                                                                                                                                                                                                                                                                       |                                                                                                                                                                                                                                                                                                                                                                                                                                                                                                                                                                                                                                                                                          |                             |                                                                                                                                                     |           |
| Pereira et al. (2020)<br><br>Portugal, High income | 5/10<br><br>71/67   | <b>Recruitment setting:</b><br>Community<br><br><b>Health status:</b> untrained postmenopausal women<br><br><b>Age (total sample):</b> 68 (6)<br><br><b>Team handball group:</b><br>n= 42 (randomised); 41 (analysed)<br><b>Age:</b> not specified<br><b>% female:</b> 100%<br><br><b>Control group:</b><br>n= 29 (randomised); 26 (analysed)<br><b>Age:</b> not specified<br><b>% female:</b> 100% | The training involved standardised warm-up (comprising running, coordination, strength, flexibility, and balance exercises) and three 15-min period of recreational team handball played as small-sided games (mainly 5v5 and 6v6) and performed on an indoor court. No hard tackles were allowed, and the balls used during the training sessions were light and made of a soft material to avoid injuries.<br><br><b>Type of sport:</b> Handball<br><br><b>Duration of the intervention (weeks):</b> 16<br><br><b>Frequency:</b> 2 to 3 sessions/week<br><br><b>Session duration (min):</b> 60 minutes<br><br><b>Delivered by:</b> not specified<br><br><b>Location:</b> not specified | Control group not specified | <b>Physical activity</b> measured by IPAQ<br><br><b>Fitness</b> measured by cycling test with breath-by-breath gas analysis (VO <sub>2</sub> peak). | 16 weeks  |
| Shimada et al. (2017)<br><br>Japan, High income    | 6/10<br><br>106/106 | <b>Recruitment setting:</b><br>Community<br><br><b>Health status:</b> Healthy                                                                                                                                                                                                                                                                                                                       | The golf training involved 10 min warm-up period and stretching exercises, followed by a half-round of golf (100 min) and a 10 min cool-down period.                                                                                                                                                                                                                                                                                                                                                                                                                                                                                                                                     | Health education            | <b>Strength:</b> grip strength assessed by hand-held dynamometer.<br><br><b>Mental health</b> measured by Geriatric Depression Scale (GDS).         | 24 weeks  |

| Author name (year)<br>Country, World Bank classification            | PEDro score<br>Randomised/analysed | Participants<br>(Setting, health status; n, age mean (SD), % female by group)                                                                                                                                                                                                                                                              | Intervention                                                                                                                                                                                                                                                                                                                                                                                                        | Control        | Outcomes                                                                                                                                                                                                                                                                                                     | Follow up |
|---------------------------------------------------------------------|------------------------------------|--------------------------------------------------------------------------------------------------------------------------------------------------------------------------------------------------------------------------------------------------------------------------------------------------------------------------------------------|---------------------------------------------------------------------------------------------------------------------------------------------------------------------------------------------------------------------------------------------------------------------------------------------------------------------------------------------------------------------------------------------------------------------|----------------|--------------------------------------------------------------------------------------------------------------------------------------------------------------------------------------------------------------------------------------------------------------------------------------------------------------|-----------|
|                                                                     |                                    | <p><b>Golf training group:</b><br/>n= 53 (randomised and analysed)<br/>Age: 70 (4)<br/>% female: 47%</p> <p><b>Control group:</b><br/>n= 53 (randomised and analysed)<br/>Age: 70 (5)<br/>% female: 45%</p>                                                                                                                                | <p><b>Type of sport:</b> Golf</p> <p><b>Duration of the intervention (weeks):</b> 24</p> <p><b>Frequency:</b> not specified</p> <p><b>Session duration (min):</b> 90 to 120</p> <p><b>Delivered by:</b> professional golfer and staff members</p> <p><b>Location:</b> Local golf club</p>                                                                                                                           |                |                                                                                                                                                                                                                                                                                                              |           |
| Skoradal et al. (2018) <sup>g,h</sup><br>Faroe Islands, High income | 5/10<br>55/50                      | <p><b>Recruitment setting:</b><br/>population register</p> <p><b>Health status:</b> prediabetes</p> <p><b>Age (total sample):</b> 61 (9)</p> <p><b>Soccer training group:</b><br/>n= 27 (analysed)<br/>Age: not specified<br/>% female: 52%</p> <p><b>Control group:</b><br/>n= 23 (analysed)<br/>Age: not specified<br/>% female: 48%</p> | <p>All sessions were organised as small-sided games (4v4-6v6) and were preceded by a 10-minute warm-up period plus dietary advice.</p> <p><b>Type of sport:</b> Soccer</p> <p><b>Duration of the intervention (weeks):</b> 16</p> <p><b>Frequency:</b> mean of 2 sessions weekly</p> <p><b>Session duration (min):</b> 30 to 60</p> <p><b>Delivered by:</b> not specified</p> <p><b>Location:</b> not specified</p> | Dietary advice | <p><b>BMD<sup>g</sup>:</b> total body measured by DXA scanning.</p> <p><b>Body composition<sup>h</sup>:</b> body mass; body fat; fat mass; lean body mass; waist circumference (DXA)</p> <p><b>Fitness<sup>h</sup></b> assessed by cycling test with breath-by-breath gas analysis (VO<sub>2</sub> max).</p> | 16 weeks  |

| Author name (year)<br>Country, World Bank classification | PEDro score<br>Randomised/analysed | Participants<br>(Setting, health status; n, age mean (SD), % female by group)                                                                                                                                                                                                                                                                                                                             | Intervention                                                                                                                                                                                                                                                                                                                                                                                                                                                                | Control         | Outcomes                                                                                                                                                                                                                                                                                                                                                                                                                                                                                                                               | Follow up |
|----------------------------------------------------------|------------------------------------|-----------------------------------------------------------------------------------------------------------------------------------------------------------------------------------------------------------------------------------------------------------------------------------------------------------------------------------------------------------------------------------------------------------|-----------------------------------------------------------------------------------------------------------------------------------------------------------------------------------------------------------------------------------------------------------------------------------------------------------------------------------------------------------------------------------------------------------------------------------------------------------------------------|-----------------|----------------------------------------------------------------------------------------------------------------------------------------------------------------------------------------------------------------------------------------------------------------------------------------------------------------------------------------------------------------------------------------------------------------------------------------------------------------------------------------------------------------------------------------|-----------|
| Uth et al. (2014) <sup>1,j</sup><br>Denmark, High income | 5/10<br>57/49                      | <p><b>Recruitment setting:</b><br/>Outpatient clinic</p> <p><b>Health status:</b> Patients with prostate cancer undergoing androgen deprivation therapy</p> <p><b>Soccer training group:</b><br/>n= 29 (randomised) and 26 (analysed)<br/>Age: 67 (7)<br/>% female: 0% (100% male)</p> <p><b>Control group:</b><br/>n= 28 (randomised) and 23 (analysed)<br/>Age: 67 (5)<br/>% female: 0% (100% male)</p> | <p>The soccer training consisted of 15 min of warm-up exercises (running, dribbling, passing, shooting, balance, and muscle strength exercises) followed 5 to 7 a-side small-sided games.</p> <p><b>Type of sport:</b> Soccer</p> <p><b>Duration of the intervention (weeks):</b> 12</p> <p><b>Frequency:</b> 2 to 3 sessions/week</p> <p><b>Session duration (min):</b> 45 to 60</p> <p><b>Delivered by:</b> experienced instructor</p> <p><b>Location:</b> University</p> | Usual care      | <p><b>Fitness<sup>i</sup></b> assessed by cycling test with breath-by-breath gas analysis (VO<sub>2</sub> max).</p> <p><b>Body composition<sup>i</sup>:</b> lean body mass and body fat mass were determined by DXA.</p> <p><b>Strength<sup>i</sup></b> measured by a knee-extensor resistance machine with the 1RM test.</p> <p><b>Physical function<sup>i</sup></b> assessed by sit to stand</p> <p><b>Balance<sup>j</sup></b> measured by a force platform.</p> <p><b>BMD<sup>j</sup>:</b> total-body measured by DXA scanning.</p> | 12 weeks  |
| Vorup et al. (2017)<br>Denmark, High income              | 5/10<br>67/48                      | <p><b>Recruitment setting:</b><br/>Community</p> <p><b>Health status:</b> Healthy untrained older people</p> <p><b>Floorball group:</b><br/>n= 22 (randomised) and 18 (analysed)<br/>Age: 74 (6)</p>                                                                                                                                                                                                      | <p>Customised and supervised small-sided floorball and 'cone ball' performed indoor on a wooden surface. During the first 4 weeks, participants performed 4x4 min separated by 4 min of rest, and this was progressively increased to 5x4 and 6x4 min in weeks 5 to 8 and 9 to 12, respectively.</p>                                                                                                                                                                        | No intervention | <p><b>Strength</b> measured by maximal thigh strength (MVC) test.</p> <p><b>Physical function</b> measured by sit to stand test.</p> <p><b>Body composition:</b> lean mass and fat mass assessed by DXA.</p>                                                                                                                                                                                                                                                                                                                           | 12 weeks  |

| Author name (year)                                                                                                                                                                                                                                                                                                                                                                                                                                                                                                                                                                                                                                                                                                                                                                                                                                                                                                     | PEDro score         | Participants                                                                                                          | Intervention                                                                                                                                                                                                                                                   | Control | Outcomes | Follow up |
|------------------------------------------------------------------------------------------------------------------------------------------------------------------------------------------------------------------------------------------------------------------------------------------------------------------------------------------------------------------------------------------------------------------------------------------------------------------------------------------------------------------------------------------------------------------------------------------------------------------------------------------------------------------------------------------------------------------------------------------------------------------------------------------------------------------------------------------------------------------------------------------------------------------------|---------------------|-----------------------------------------------------------------------------------------------------------------------|----------------------------------------------------------------------------------------------------------------------------------------------------------------------------------------------------------------------------------------------------------------|---------|----------|-----------|
| Country, World Bank classification                                                                                                                                                                                                                                                                                                                                                                                                                                                                                                                                                                                                                                                                                                                                                                                                                                                                                     | Randomised/analysed | (Setting, health status; n, age mean (SD), % female by group)                                                         |                                                                                                                                                                                                                                                                |         |          |           |
|                                                                                                                                                                                                                                                                                                                                                                                                                                                                                                                                                                                                                                                                                                                                                                                                                                                                                                                        |                     | % female: 56%<br><br><b>B. Control group:</b><br>n= 22 (randomised) and 17 (analysed)<br>Age: 72 (7)<br>% female: 53% | <b>Type of sport:</b> floorball<br><br><b>Duration of the intervention (weeks):</b> 12<br><br><b>Frequency:</b> 3 sessions/week<br><br><b>Session duration (min):</b> 16 to 24<br><br><b>Delivered by:</b> not specified<br><br><b>Location:</b> not specified |         |          |           |
| Same trials reporting different outcomes: <sup>a</sup> Andersen et al. 2014, <sup>b</sup> Andersen et al. 2016, <sup>c</sup> Helge et al. 2014, <sup>d</sup> Sundstrup et al. 2016, <sup>e</sup> De Sousa et al. 2019, <sup>f</sup> Vieira de Sousa et al. 2019, <sup>g</sup> Skoradal et al. 2018 (a), <sup>h</sup> Skoradal et al. 2018 (b), <sup>i</sup> Uth et al. 2014, <sup>j</sup> Uth et al. 2016.<br>*Data for these outcomes were not included in the meta-analysis, as the authors only reported pooled sport intervention and resistance training results.<br>DXA: Dual energy X-ray absorptiometry; IPAQ: International Physical Activity Questionnaire; SF-12: 12-Item Short Form Health Survey; BMD: bone mineral density; FACT-P: Functional Assessment of Cancer Therapy–Prostate; OPQOL: Older People’s Quality of Life questionnaire; GDS: Geriatric Depression Scale; MVC: maximal thigh strength. |                     |                                                                                                                       |                                                                                                                                                                                                                                                                |         |          |           |
