# Supplementary material
Source: HighWire-hosted journal article supplement (https://bjsm.bmj.com/content/57/4/230)

**Supplementary Figure 1** Funnel plot of standard error by Hedges'g for trials included in the meta-analysis for strength and physical function. Each circle represents one trial.

**a) Strength (Egger's test p-value= 0.59)**

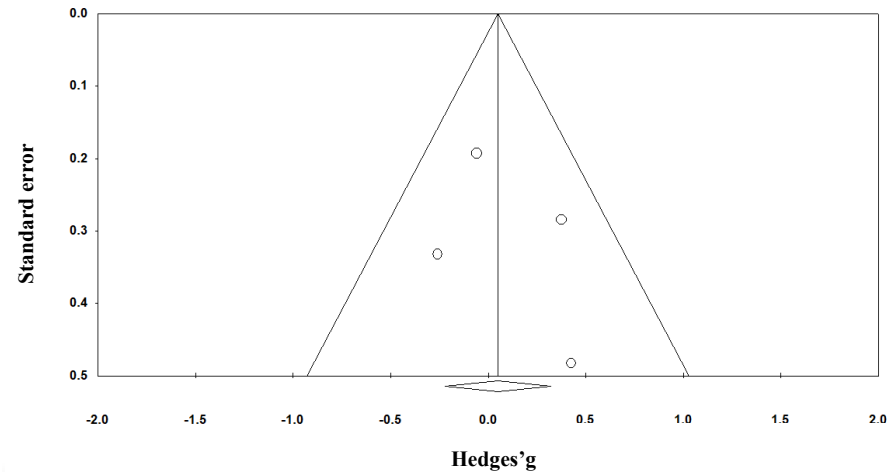

**b) Physical function (Egger's test p-value= 0.11)**

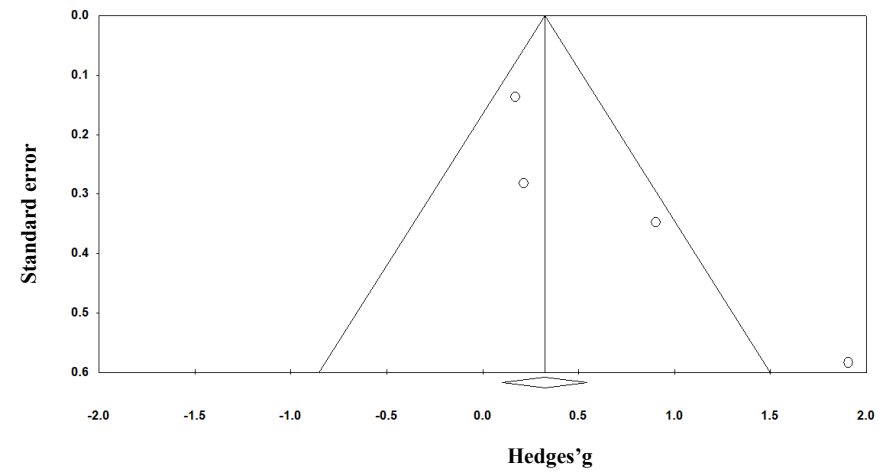

Supplement: inline-supplementary-material-5 [file inline-supplementary-material-5.pdf]
