# Supplementary material
Source: HighWire-hosted journal article supplement (https://bjsm.bmj.com/content/57/4/230)
Supplement: inline-supplementary-material-7 [file inline-supplementary-material-7.pdf]

**Supplementary Table 4** Summary of the quality of evidence and strength of recommendation (GRADE)<sup>a</sup>

| Quality Assessment        |                                |                            |                          |          |                               |
|---------------------------|--------------------------------|----------------------------|--------------------------|----------|-------------------------------|
| Meta-analysis             | Downgraded                     |                            |                          | Overall  |                               |
|                           | Study limitations <sup>1</sup> | Inconsistency <sup>2</sup> | Imprecision <sup>3</sup> |          | Publication bias <sup>4</sup> |
| Cardiorespiratory fitness | ↓                              |                            | ↓                        | Low      |                               |
| Physical function         | ↓                              | ↓                          | ↓                        | Very low |                               |
| Strength                  | ↓                              |                            | ↓                        | Low      |                               |
| Fat mass                  | ↓                              |                            | ↓                        | Low      |                               |
| Lean mass                 | ↓                              |                            | ↓                        | Low      |                               |
| Bone mineral density      | ↓                              |                            | ↓                        | ↓        | Very low                      |

<sup>a</sup>We were unable to assess the certainty of the evidence for physical activity, balance, mental health and quality of life outcomes, as their results are from < 3 studies.

<sup>1</sup>>25% of participants from studies with low methodologic quality: PEDro score <6

<sup>2</sup>Heterogeneity > 60%

<sup>3</sup><400 participants across all studies

<sup>4</sup>Serious small study effects suggested by funnel plot.

↓ Downgraded
